# Supplementary material
Source: MDPI journal article supplement (https://www.mdpi.com/2673-9976/12/1/2)
Supplement: s1 [file s1]

# Fruits and Vegetables as Sources of Carotenoids in Complementary Feeding

Daria Masztalerz-Kozubek<sup>1</sup>, Monika A. Zielinska-Pukos<sup>1,\*</sup>, Jadwiga Hamulka<sup>1</sup>

<sup>1</sup>Department of Human Nutrition, Institute of Human Nutrition Sciences, Warsaw University of Life Sciences (SGGW-WULS);

daria\_masztalerz\_kozubek@sggw.edu.pl, monika\_zielinska\_pukos@sggw.edu.pl, jadwiga\_hamulka@sggw.edu.pl

\*Correspondence: monika\_zielinska\_pukos@sggw.edu.pl

## Background

Proper nutrition in first years of life is crucial for children development. Fruits and vegetables are sources of numerous nutrients and bioactive compounds, such as carotenoids with antioxidant potential.

## Aims

- to investigate if fruits and vegetables rich in carotenoids are offered as first solids
- to assess if early nutritional factors may be associated with offering them

## Materials and Methods

→ Internet-based study, conducted in 2016-2018

→ 4104 mothers of children aged 12-36 months from Poland

→ questionnaire: exclusive breastfeeding duration, timing and method of complementary feeding introduction, first 5-10 products that were offered as first solids (qualitative method)

→ statistical analysis:  $\chi^2$  test

## Conclusions

Carrot and broccoli were the most often offered first solids. Early nutrition factors, such as exclusive breastfeeding duration, method and age at complementary feeding introduction may be associated with offering different fruits/vegetables that are sources of carotenoids.

Offered as first solid (%)

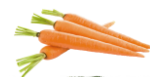

89.8\*

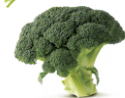

54.0\*\*

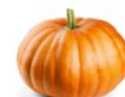

39.7

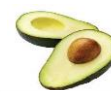

3.1

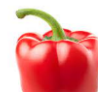

0.9

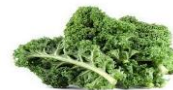

0.02

\* richest source of carotenoids  
 \*\* highest antioxidant capacity  
[1,2,3]

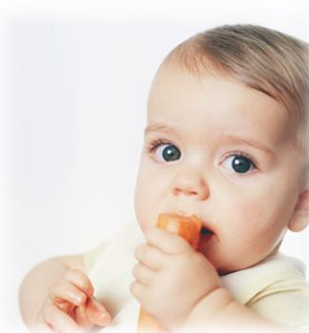

## Results

| Products offered as 1st solid | Age at complementary feeding introduction (%) |                 |                 | P             |                |       |
|-------------------------------|-----------------------------------------------|-----------------|-----------------|---------------|----------------|-------|
|                               | < 4 mo (n=102)                                | 4-6 mo (n=2486) | ≥ 7 mo (n=1516) |               |                |       |
| Pumpkin                       | 40.2                                          | 41.2            | 37.2            | 0.041         |                |       |
| Sweet potato                  | 3.9                                           | 7.5             | 13.7            | 0.000         |                |       |
| Tomato                        | 2.0                                           | 2.7             | 5.1             | 0.000         |                |       |
| Avocado                       | 0.0                                           | 2.7             | 4.0             | 0.012         |                |       |
| Broccoli                      | 33.3                                          | 50.4            | 61.2            | 0.000         |                |       |
|                               | Complementary feeding method (%)              |                 |                 | P             |                |       |
|                               | TSF (n=1152)                                  | Mixed (n=2244)  | BLW (n=708)     |               |                |       |
| Pumpkin                       | 47.6                                          | 41.9            | 20.1            | 0.000         |                |       |
| Sweet potato                  | 4.4                                           | 9.8             | 17.9            | 0.000         |                |       |
| Tomato                        | 1.1                                           | 3.2             | 8.9             | 0.000         |                |       |
| Avocado                       | 1.2                                           | 3.1             | 6.2             | 0.000         |                |       |
| Broccoli                      | 41.9                                          | 55.6            | 68.5            | 0.000         |                |       |
|                               | Exclusive breastfeeding duration (%)          |                 |                 |               |                | P     |
|                               | Never (n=2290)                                | 1-3 mo (n=105)  | 4-5 mo (n=408)  | 6 mo (n=1105) | ≥ 7 mo (n=196) |       |
| Pumpkin                       | 41.1                                          | 30.5            | 43.4            | 38.6          | 27.0           | 0.000 |
| Sweet potato                  | 9.4                                           | 6.7             | 5.6             | 11.5          | 12.8           | 0.004 |
| Tomato                        | 3.1                                           | 3.8             | 1.5             | 5.2           | 4.6            | 0.003 |
| Avocado                       | 2.3                                           | 1.0             | 3.4             | 4.4           | 5.6            | 0.002 |
| Broccoli                      | 54.2                                          | 38.1            | 46.6            | 57.8          | 53.6           | 0.000 |

1. USDA National Nutrient Database,  
 2. USDA Database for the Oxygen Radical Absorbance Capacity (ORAC) of Selected Foods, Release 2, 2010.  
 3. Hamulka J., Wawrzyniak A.: Lycopene and lutein - pro-health properties and their content in products. SGGW Publ. Warsaw 2004.
